# Supplementary material
Source: publisher figshare collection journal article supplement (https://tandf.figshare.com/articles/dataset/_/22289610)
Supplement: Supplementary file 1 [file 1]

Pre-Trip Survey (ipFT and iVFT)

Before you take either the Field Trip or Virtual Field Trip to Grand Canyon, please fully complete this **2-**page survey and turn it in.

**Part 1**

This survey consists of a number of words that describe different feelings and emotions. Read each item and then circle the number from the scale below next to each word. Indicate to what extent you feel this way ***in anticipation of the trip you will participate in.***

|  | 1  Very slightly or not at all | 2  A little | 3  Moderately | 4  Quite a bit | 5  Extremely |
| --- | --- | --- | --- | --- | --- |
| Interested | 1 | 2 | 3 | 4 | 5 |
| Distracted | 1 | 2 | 3 | 4 | 5 |
| Excited | 1 | 2 | 3 | 4 | 5 |
| Bored | 1 | 2 | 3 | 4 | 5 |
| Enthusiastic | 1 | 2 | 3 | 4 | 5 |
| Confused | 1 | 2 | 3 | 4 | 5 |
| Inspired | 1 | 2 | 3 | 4 | 5 |
| Passive | 1 | 2 | 3 | 4 | 5 |
| Attentive | 1 | 2 | 3 | 4 | 5 |
| Overwhelmed | 1 | 2 | 3 | 4 | 5 |
| Active | 1 | 2 | 3 | 4 | 5 |
| Unfocused | 1 | 2 | 3 | 4 | 5 |
| Curious | 1 | 2 | 3 | 4 | 5 |
| Uncomfortable | 1 | 2 | 3 | 4 | 5 |
|  | 1  Very slightly or not at all | 2  A little | 3  Moderately | 4  Quite a bit | 5  Extremely |

**Part 2**

Please answer each of these questions as they pertain to you personally today, and in as much detail as possible. Don’t worry too much about precise spelling or grammar, but please try to write legibly so we can understand your responses! Feel free to continue writing on the blank side of the page if you need more room.

1. What are *at least* ***two*** *things* that you **already know** about the geology of Grand Canyon? (Feel free to list more than two!)
2. What are *at least* ***two*** *things* you would **like to know** about the geology of Grand Canyon? (Feel free to list more than two!)

Post-Trip Survey (ipFT)

After you have completed the Trail of Time hike at Grand Canyon, please fully complete this **3-**page survey and **turn it in as soon as possible.**

**Part 1**

This survey consists of a number of words that describe different feelings and emotions. Read each item and then circle the number from the scale below next to each word. Indicate to what extent you feel or felt this way ***after the hike.***

|  | 1  Very slightly or not at all | 2  A little | 3  Moderately | 4  Quite a bit | 5  Extremely |
| --- | --- | --- | --- | --- | --- |
| Interested | 1 | 2 | 3 | 4 | 5 |
| Distracted | 1 | 2 | 3 | 4 | 5 |
| Excited | 1 | 2 | 3 | 4 | 5 |
| Bored | 1 | 2 | 3 | 4 | 5 |
| Enthusiastic | 1 | 2 | 3 | 4 | 5 |
| Confused | 1 | 2 | 3 | 4 | 5 |
| Inspired | 1 | 2 | 3 | 4 | 5 |
| Passive | 1 | 2 | 3 | 4 | 5 |
| Attentive | 1 | 2 | 3 | 4 | 5 |
| Overwhelmed | 1 | 2 | 3 | 4 | 5 |
| Active | 1 | 2 | 3 | 4 | 5 |
| Unfocused | 1 | 2 | 3 | 4 | 5 |
| Curious | 1 | 2 | 3 | 4 | 5 |
| Uncomfortable | 1 | 2 | 3 | 4 | 5 |
|  | 1  Very slightly or not at all | 2  A little | 3  Moderately | 4  Quite a bit | 5  Extremely |

**Part 2**

Please answer each of these questions as they pertain to you personally today, and in as much detail as possible. Don’t worry too much about precise spelling or grammar, but please try to write legibly so we can understand your responses! Feel free to continue writing on the blank side of the page if you need more room.

1. Was this your first visit to Grand Canyon? If not, please briefly describe any previous visits you had.
2. Please list and describe any factors that helped you learn Grand Canyon geology today.
3. Please list and describe any factors that made it difficult for you to learn Grand Canyon geology today.
4. What are the two most important things you learned about the geology of Grand Canyon today?
5. Can you articulate any misconceptions you had, either about the geology of Grand Canyon, or geology in general, that were cleared up after this visit?
6. What are *at least* ***two*** *things* you would like to know more about after visiting Grand Canyon today? (Feel free to list more than two!)

Post-Trip Survey (iVFT)

After you have completed the Grand Canyon Virtual Field Trip, please print out and fully complete this 3-page survey, and turn it in at the start of class on Tuesday.

**Part 1**

This survey consists of a number of words that describe different feelings and emotions. Read each item and then circle the number from the scale below next to each word. Indicate to what extent you feel or felt this way **right after completing the Virtual Field Trip**.

|  | 1  Very slightly or not at all | 2  A little | 3  Moderately | 4  Quite a bit | 5  Extremely |
| --- | --- | --- | --- | --- | --- |
| Interested | 1 | 2 | 3 | 4 | 5 |
| Distracted | 1 | 2 | 3 | 4 | 5 |
| Excited | 1 | 2 | 3 | 4 | 5 |
| Bored | 1 | 2 | 3 | 4 | 5 |
| Enthusiastic | 1 | 2 | 3 | 4 | 5 |
| Confused | 1 | 2 | 3 | 4 | 5 |
| Inspired | 1 | 2 | 3 | 4 | 5 |
| Passive | 1 | 2 | 3 | 4 | 5 |
| Attentive | 1 | 2 | 3 | 4 | 5 |
| Overwhelmed | 1 | 2 | 3 | 4 | 5 |
| Active | 1 | 2 | 3 | 4 | 5 |
| Unfocused | 1 | 2 | 3 | 4 | 5 |
| Curious | 1 | 2 | 3 | 4 | 5 |
| Uncomfortable | 1 | 2 | 3 | 4 | 5 |
|  | 1  Very slightly or not at all | 2  A little | 3  Moderately | 4  Quite a bit | 5  Extremely |

**Part 2**

Please answer each of these questions as they pertain to you personally today, and in as much detail as possible.

1. Have you been to Grand Canyon personally before? If so, please briefly describe any previous visits you had.
2. Having completed this Virtual Field Trip, are you ***more*** or ***less*** interested in visiting Grand Canyon in person? Please briefly explain your answer.
3. Please list and describe any factors that helped you learn Grand Canyon geology today.
4. Please list and describe any factors that made it difficult for you to learn Grand Canyon geology today.
5. What are the two most important things you learned about the geology of Grand Canyon today?
6. Can you articulate any misconceptions you had, either about the geology of Grand Canyon, or geology in general, that were cleared up after this virtual field trip?
7. What are *at least* ***two*** *things* you would like to know more about after virtually visiting Grand Canyon today? (Feel free to list more than two!)
